# Supplementary material for: De novo identification of complex multimorbid conditions by integration of gene regulation and protein interaction networks with genome-wide association studies
Source: Research Square preprint supplement (doi:10.21203/rs.3.rs-1313207/v1), 2022-03-01
Supplement: Supplementary file 1 [file 1d2048fafecb863e8d7332d6.xlsx]

## Sheet: Supplementary Data 8
Supplementary Data 8. Acute lymphoblastic leukemia-associated SNPs obtained using a keyword search for “Acute lymphoblastic leukemia (childhood)” in the GWAS catalog (v1.0.2, 18/06/2021).
snp
rs4132601
rs2239633
rs7089424
rs2089222
rs7554607
rs9290663
rs10849033
rs10821936
rs11978267
rs11155133
rs2191566
rs10873876
rs6428370
rs1881797
rs1879352
rs563507
rs12621643
rs17079534
rs7578361
rs41322152
rs7142143
rs10170236
rs6683977
rs17837497
rs1496766
rs9958208
rs546784
rs6964969
rs4982731
rs17505102
rs1945213
rs3942852
rs7156960
rs207954
rs920590
rs282708
rs343604
rs630662
rs17423910
rs6901152
rs936094
rs6445754
rs2167364
rs7738636
rs4245595
rs1110701
rs2390536
rs4617118
rs2290400
rs2069426
rs4748813
rs3740540
