# Supplementary material for: De novo identification of complex multimorbid conditions by integration of gene regulation and protein interaction networks with genome-wide association studies
Source: Research Square preprint supplement (doi:10.21203/rs.3.rs-1313207/v1), 2022-03-01
Supplement: Supplementary file 2 [file 224ad869e166048757d83418.xlsx]

## Sheet: Supplementary Data 7
Supplementary Data 7. Asthma protein-protein interaction network.
source node	target node
ENSG00000111087	ENSG00000131437
ENSG00000204516	ENSG00000204520
ENSG00000065675	ENSG00000198502
ENSG00000065675	ENSG00000237541
ENSG00000065675	ENSG00000232629
ENSG00000065675	ENSG00000198821
ENSG00000065675	ENSG00000196126
ENSG00000065675	ENSG00000196735
ENSG00000065675	ENSG00000179344
ENSG00000115607	ENSG00000115604
ENSG00000108349	ENSG00000198563
ENSG00000108349	ENSG00000197728
ENSG00000087088	ENSG00000196419
ENSG00000161395	ENSG00000131748
ENSG00000167914	ENSG00000172057
ENSG00000188389	ENSG00000237541
ENSG00000188389	ENSG00000232629
ENSG00000188389	ENSG00000196126
ENSG00000188389	ENSG00000198502
ENSG00000188389	ENSG00000196735
ENSG00000188389	ENSG00000179344
ENSG00000196735	ENSG00000241106
ENSG00000196735	ENSG00000198502
ENSG00000196735	ENSG00000237541
ENSG00000196735	ENSG00000232629
ENSG00000196735	ENSG00000196126
ENSG00000196735	ENSG00000234745
ENSG00000196735	ENSG00000131437
ENSG00000196735	ENSG00000179344
ENSG00000172977	ENSG00000188895
ENSG00000172977	ENSG00000196419
ENSG00000125245	ENSG00000163485
ENSG00000161405	ENSG00000172057
ENSG00000161405	ENSG00000073605
ENSG00000196126	ENSG00000241106
ENSG00000196126	ENSG00000198502
ENSG00000196126	ENSG00000237541
ENSG00000196126	ENSG00000232629
ENSG00000196126	ENSG00000198821
ENSG00000196126	ENSG00000234745
ENSG00000196126	ENSG00000131437
ENSG00000196126	ENSG00000179344
ENSG00000237541	ENSG00000232629
ENSG00000237541	ENSG00000241106
ENSG00000237541	ENSG00000198502
ENSG00000237541	ENSG00000234745
ENSG00000237541	ENSG00000131437
ENSG00000237541	ENSG00000179344
ENSG00000179344	ENSG00000241106
ENSG00000179344	ENSG00000198502
ENSG00000179344	ENSG00000232629
ENSG00000179344	ENSG00000234745
ENSG00000179344	ENSG00000131437
ENSG00000198502	ENSG00000241106
ENSG00000198502	ENSG00000232629
ENSG00000198502	ENSG00000234745
ENSG00000198502	ENSG00000131437
ENSG00000172057	ENSG00000073605
ENSG00000131437	ENSG00000241106
ENSG00000131437	ENSG00000232629
ENSG00000241106	ENSG00000232629
ENSG00000241106	ENSG00000234745
ENSG00000232629	ENSG00000234745
ENSG00000198933
ENSG00000167074
ENSG00000133063
ENSG00000173327
ENSG00000137815
ENSG00000226979
ENSG00000204301
ENSG00000158869
ENSG00000101751
ENSG00000134882
ENSG00000110367
ENSG00000170145
ENSG00000160712
ENSG00000204305
ENSG00000204410
ENSG00000100418
ENSG00000142655
ENSG00000117586
ENSG00000204351
ENSG00000143847
ENSG00000180902
ENSG00000137312
ENSG00000204304
ENSG00000166278
ENSG00000008838
ENSG00000198917
ENSG00000077238
ENSG00000151952
ENSG00000085377
ENSG00000101246
ENSG00000128872
ENSG00000134825
ENSG00000135953
ENSG00000134824
ENSG00000186470
ENSG00000125817
ENSG00000113552
ENSG00000187446
ENSG00000149485
ENSG00000139531
ENSG00000259956
ENSG00000185917
ENSG00000182134
ENSG00000204536
ENSG00000203791
ENSG00000204315
ENSG00000137764
ENSG00000197208
ENSG00000100417
ENSG00000197375
ENSG00000131507
ENSG00000135457
ENSG00000103591
ENSG00000170185
ENSG00000174004
ENSG00000142599
ENSG00000197712
