# Supplementary material for: De novo identification of complex multimorbid conditions by integration of gene regulation and protein interaction networks with genome-wide association studies
Source: Research Square preprint supplement (doi:10.21203/rs.3.rs-1313207/v1), 2022-03-01
Supplement: Supplementary file 3 [file 54c1248a6111c1aee4dca4a4.xlsx]

## Sheet: Supplementary Data 2
Supplementary Data 2. Spatially regulated genes in the blood map and their associated LOEUF score (if available) obtained from gnomAD.
gene	oe_lof_upper	interaction
A1BG	1.208	cis
A2M	0.544	cis_intra
A2ML1	0.952	inter_intra
A3GALT2	1.764	cis
A4GALT	1.654	cis
AAAS	0.988	cis_intra
AACS	1.088	cis_inter_intra
AADAC	0.944	trans-intra
AAGAB	1.037	cis
AAK1	0.129	inter_intra
AANAT	1.227	cis
AAR2	1.348	cis
AARS	0.617	inter_intra
AARS2	0.835	cis
AASDH	0.828	cis
AASDHPPT	0.717	trans-intra
AASS	0.809	cis_intra
AATF	1.065	cis_inter_intra
AATK	0.403	cis_inter_intra
ABAT	0.567	cis_intra
ABCA1	0.486	cis_inter_intra
ABCA10	0.968	cis_inter_intra
ABCA13	1.035	cis_inter_intra
ABCA2	0.169	cis
ABCA3	0.501	cis_inter
ABCA5	0.838	cis_inter_intra
ABCA6	0.864	trans-intra
ABCA7	1.067	cis
ABCA8	1.186	inter_intra
ABCA9	1.07	cis_intra
ABCB1	0.473	inter_intra
ABCB4	0.508	inter_intra
ABCB7	0.109	trans-intra
ABCB8	1.081	cis
ABCB9	0.653	cis_inter
ABCC1	0.397	cis_inter_intra
ABCC10	0.941	cis
ABCC11	1.236	cis_intra
ABCC2	1.158	cis_intra
ABCC3	0.896	cis_intra
ABCC4	0.492	inter_intra
ABCC5	0.387	cis_inter_intra
ABCC6	1.026	cis
ABCD1	0.15	cis
ABCD2	0.718	cis
ABCD3	0.435	cis_intra
ABCD4	0.898	cis_inter_intra
ABCF2	0.478	cis
ABCF3	0.573	cis
ABCG1	0.461	cis
ABCG2	1.549	cis_intra
ABHD10	1.061	cis
ABHD11	0.941	cis
ABHD12	0.763	cis_inter_intra
ABHD12B	1.582	cis
ABHD13	0.406	cis
ABHD14A	1.395	cis_intra
ABHD14B	1.695	trans-intra
ABHD15	1.489	cis
ABHD16A	0.384	cis_intra
ABHD17C	0.302	cis_inter_intra
ABHD2	0.431	cis_intra
ABHD3	1.181	cis
ABHD4	1.073	cis
ABHD5	0.982	trans-intra
ABHD6	0.984	trans-intra
ABHD8	0.31	cis
ABI1	0.418	cis_inter_intra
ABI2	0.46	cis_intra
ABI3BP	0.558	cis_inter_intra
ABL1	0.176	cis_inter_intra
ABL2	0.58	cis_inter
ABLIM1	0.326	cis_inter_intra
ABLIM2	0.465	inter_intra
ABLIM3	0.59	trans-intra
ABR	0.361	cis_inter_intra
ABRACL	1.371	cis
ABT1	1.015	cis_intra
ABTB1	0.756	cis
ABTB2	0.464	cis_inter_intra
AC004381.6	0.856	cis
AC009403.2	1.888	cis
AC016757.3	1.945	cis
AC018816.3	1.851	cis_intra
AC062017.1	1.934	cis
AC090616.2	1.86	cis
AC129492.6	NA	cis
ACAA1	1.118	cis
ACAA2	1.306	cis_intra
ACACA	0.216	cis_inter_intra
ACACB	0.857	cis_inter_intra
ACAD10	1.085	trans-intra
ACAD11	0.883	cis_intra
ACAD8	1.27	cis
ACAD9	0.814	cis
ACADM	1.153	cis_intra
ACADS	0.95	cis
ACADSB	1.172	cis_inter
ACADVL	1.05	cis
ACAP1	0.423	cis
ACAP2	0.324	cis_inter
ACAT1	1.051	cis
ACBD3	0.539	cis_intra
ACBD4	0.926	cis
ACBD5	0.529	cis
ACBD6	1.129	cis_intra
ACBD7	1.19	cis
ACCS	0.839	cis_intra
ACD	1.187	cis
ACER1	1.002	cis_inter
ACER2	0.695	trans-inter
ACER3	0.388	cis_inter_intra
ACIN1	0.201	cis_inter
ACKR2	1.47	trans-intra
ACKR4	1.803	trans-intra
ACLY	0.377	cis
ACO1	0.932	cis_inter
ACO2	0.417	inter_intra
ACOT1	1.528	cis
ACOT11	1.082	cis_intra
ACOT13	1.936	cis_intra
ACOT2	1.327	cis
ACOT4	1.655	cis
ACOT7	0.434	cis_inter
ACOT9	1.18	cis
ACOX1	0.462	cis
ACOX2	0.87	cis
ACOX3	1.063	cis_intra
ACOXL	1.097	inter_intra
ACP1	1.802	cis
ACP2	0.753	cis
ACP5	0.724	cis
ACP6	1.387	cis
ACPP	1.403	cis_intra
ACSF2	0.654	cis_intra
ACSF3	1.772	cis_inter_intra
ACSL1	0.476	cis_inter_intra
ACSL3	0.55	cis
ACSL4	0.306	cis_intra
ACSL5	0.727	cis_intra
ACSL6	0.475	cis_intra
ACSM1	1.074	cis_inter_intra
ACSM3	1.055	cis_inter_intra
ACSM5	1.258	cis
ACSS1	0.759	cis
ACSS2	0.903	trans-intra
ACSS3	0.951	cis_inter_intra
ACTA2	0.364	cis
ACTG1	0.858	cis
ACTN1	0.213	cis_intra
ACTN2	0.239	trans-intra
ACTN4	0.099	cis_inter_intra
ACTR10	0.658	cis
ACTR1A	0.327	cis
ACTR1B	0.684	cis
ACTR3	0.118	cis_intra
ACTR3B	0.192	cis
ACTR3C	1.374	cis
ACTR5	1.006	cis_intra
ACTR6	1.083	cis_intra
ACTR8	0.988	cis_intra
ACTRT3	1.71	cis
ACVR1	0.454	trans-intra
ACVR1B	0.172	trans-intra
ACVR1C	0.634	cis_intra
ACVR2A	0.17	cis_intra
ACVR2B	0.377	cis
ACY3	1.426	cis
ACYP2	1.836	cis_inter_intra
ADA	1.321	cis
ADAL	1.174	cis
ADAM10	0.117	cis_inter_intra
ADAM11	0.531	cis
ADAM12	0.594	cis_inter_intra
ADAM15	0.864	cis
ADAM17	0.28	trans-intra
ADAM19	0.501	cis_inter_intra
ADAM22	0.363	cis_inter_intra
ADAM23	0.275	cis_inter_intra
ADAM28	1.162	cis
ADAM33	0.922	cis
ADAM8	0.926	cis
ADAM9	0.417	cis_intra
ADAMDEC1	1.288	cis
ADAMTS1	0.367	cis
ADAMTS10	0.33	cis
ADAMTS13	0.683	cis
ADAMTS14	0.709	cis_intra
ADAMTS17	0.732	cis_inter_intra
ADAMTS2	0.311	cis_inter_intra
ADAMTS3	0.604	cis_inter_intra
ADAMTS6	0.22	cis_inter_intra
ADAMTS7	0.646	cis
ADAMTSL2	0.735	cis_intra
ADAMTSL4	1.093	cis
ADAMTSL4-AS1	NA	cis_inter
ADAMTSL5	1.151	cis_intra
ADAP1	0.439	cis
ADAR	0.42	cis_inter
ADARB1	0.399	cis_inter_intra
ADARB2	0.382	cis_inter_intra
ADAT1	1.187	cis
ADAT2	1.57	cis_intra
ADCK1	1.283	cis_intra
ADCK2	0.92	cis
ADCK5	0.588	cis_intra
ADCY10	1.034	trans-intra
ADCY5	0.254	trans-intra
ADCY7	0.552	cis_intra
ADCY9	0.306	cis_inter_intra
ADD1	0.296	cis_inter
ADD2	0.274	cis_intra
ADD3	0.246	cis_inter_intra
ADH4	1.27	trans-intra
ADH5	1.562	cis
ADHFE1	1.045	cis
ADIPOR1	0.469	cis
ADIPOR2	0.518	cis_inter_intra
ADK	0.798	cis_inter_intra
ADM2	1.483	trans-intra
ADNP	0.123	trans-intra
ADO	0.81	cis
ADORA1	1.1	cis_intra
ADORA2A	0.551	cis_intra
ADORA2B	1.485	cis_intra
ADORA3	1.066	cis
ADPGK	0.715	cis_inter_intra
ADPRH	1.283	cis_inter
ADPRHL1	1.374	trans-inter
ADPRM	1.107	cis
ADRB1	1.542	cis
ADRB2	0.591	cis
ADSL	1.071	cis
ADSS	0.454	cis
ADSSL1	0.843	cis
ADTRP	1.365	cis_inter_intra
AEBP1	0.64	cis
AEBP2	0.145	cis_inter_intra
AEN	1.878	cis
AES	0.361	cis
AFAP1	0.665	cis_inter_intra
AFAP1L1	0.886	trans-intra
AFAP1L2	0.487	cis_intra
AFF1	0.347	cis_inter_intra
AFF2	0.275	cis_inter_intra
AFF3	0.221	cis_inter_intra
AFF4	0.138	cis_intra
AFG3L2	0.7	cis_intra
AFMID	1.099	cis
AFTPH	0.141	cis_intra
AGA	1.044	cis
AGAP1	0.231	cis_inter_intra
AGAP2	0.267	cis
AGAP3	0.335	cis
AGAP6	1.562	cis
AGBL2	0.893	trans-intra
AGER	1.346	cis_intra
AGFG1	0.278	cis_intra
AGGF1	0.583	trans-intra
AGK	0.878	cis_intra
AGL	0.795	cis_intra
AGO1	0.057	trans-intra
AGO2	0.106	inter_intra
AGO3	0.193	trans-intra
AGO4	0.218	trans-intra
AGPAT1	0.307	cis
AGPAT2	1.539	cis
AGPAT3	0.142	cis_inter_intra
AGPAT4	0.534	cis_inter_intra
AGPAT5	0.979	cis_intra
AGPS	0.117	cis_intra
AGRN	0.435	cis
AGTPBP1	0.351	cis_inter_intra
AGTRAP	0.951	cis_intra
AGXT	1.028	trans-inter
AHCTF1	0.129	cis_intra
AHCY	0.616	trans-inter
AHCYL2	0.29	inter_intra
AHI1	0.95	cis_intra
AHNAK	0.308	cis_inter_intra
AHR	0.154	cis_intra
AHRR	0.75	cis_intra
AHSA2	1.642	cis
AICDA	1.329	cis
AIDA	0.88	trans-inter
AIF1	1.619	cis
AIF1L	1.02	cis_inter
AIFM1	0.234	trans-intra
AIFM2	1.083	cis
AIFM3	0.988	cis
AIG1	1.383	cis_inter_intra
AIM1	1.006	cis_inter_intra
AIM1L	0.793	cis
AIM2	1.636	cis_intra
AIMP1	1.216	cis
AIMP2	0.967	cis
AIP	0.518	cis
AK2	1.223	cis_inter_intra
AK3	1.391	cis_intra
AK4	0.788	cis_intra
AK5	0.558	cis_inter_intra
AK8	1.19	cis_inter_intra
AK9	0.738	cis_intra
AKAP1	0.373	cis_inter_intra
AKAP10	0.441	cis_intra
AKAP11	0.3	cis
AKAP12	0.426	cis_inter_intra
AKAP13	0.294	cis_inter_intra
AKAP17A	0.524	cis
AKAP2	0.527	cis_inter_intra
AKAP3	0.528	cis_intra
AKAP7	1.222	cis_intra
AKAP8	0.397	cis
AKAP9	0.404	cis_intra
AKIP1	1.576	cis_intra
AKIRIN1	0.496	cis
AKIRIN2	0.376	trans-intra
AKNA	0.454	cis_inter_intra
AKR1A1	1.121	cis
AKR1B1	0.997	cis
AKR1C1	1.588	cis
AKR1C2	1.46	cis
AKR1E2	1.419	cis_inter
AKR7A2	1.522	cis
AKR7A3	1.928	cis
AKT1	0.315	cis_intra
AKT1S1	0.834	cis
AKT2	0.417	cis
AKT3	0.178	cis_inter_intra
AKTIP	0.504	cis
ALAD	0.868	cis
ALAS1	0.49	trans-inter
ALB	0.387	trans-inter
ALCAM	0.386	cis_inter_intra
ALDH16A1	1.076	cis_intra
ALDH18A1	0.519	cis_intra
ALDH1A1	0.335	cis_inter_intra
ALDH1A2	0.447	cis_inter_intra
ALDH1L1	0.776	cis_intra
ALDH1L2	0.922	cis_inter_intra
ALDH2	1.094	cis_inter_intra
ALDH3A2	0.825	cis_intra
ALDH3B1	0.995	cis
ALDH3B2	1.656	cis
ALDH4A1	0.714	cis_inter
ALDH5A1	0.937	cis_intra
ALDH6A1	0.945	cis
ALDH7A1	1.24	cis_intra
ALDH8A1	1.462	cis_intra
ALDH9A1	1.138	cis_intra
ALDOB	1.1	cis
ALG1	1.499	trans-intra
ALG10B	1.365	cis_intra
ALG12	1.033	cis_inter
ALG13	0.16	trans-intra
ALG14	1.196	cis_intra
ALG1L	1.944	cis
ALG5	0.453	trans-intra
ALG6	0.641	cis_intra
ALG8	0.83	cis_intra
ALG9	0.653	trans-intra
ALKBH1	1.026	cis
ALKBH2	1.198	cis
ALKBH3	1.324	cis_intra
ALKBH4	0.802	cis
ALKBH5	0.343	cis
ALKBH6	0.677	cis
ALKBH7	1.634	cis_inter
ALKBH8	0.666	cis_intra
ALMS1	0.874	cis_inter_intra
ALOX12	1.039	cis
ALOX15	1.338	cis
ALOX15B	1.184	cis
ALOX5	0.636	cis_intra
ALOX5AP	0.963	cis_intra
ALPK1	0.929	cis_intra
ALPK2	0.815	cis_inter_intra
ALPK3	0.911	cis_intra
ALPL	0.693	cis_intra
ALS2	0.516	cis
ALS2CL	1.082	cis
ALS2CR12	1.462	cis_intra
AMACR	0.747	cis
AMBP	1.374	trans-intra
AMBRA1	0.14	inter_intra
AMD1	0.284	trans-intra
AMDHD1	1.166	cis_intra
AMDHD2	0.81	cis_intra
AMFR	0.63	cis_inter_intra
AMH	1.771	cis
AMIGO1	0.238	cis
AMIGO2	0.55	cis
AMMECR1	0.472	trans-intra
AMMECR1L	0.255	cis_intra
AMOT	0.266	cis
AMOTL1	0.471	cis_inter_intra
AMPD2	0.638	cis
AMPD3	0.907	cis_inter_intra
AMPH	0.569	cis_inter_intra
AMT	0.789	cis
AMY2A	1.678	cis
AMY2B	1.723	cis
AMZ2	1.445	cis
ANAPC1	0.305	cis
ANAPC10	1.056	cis_inter_intra
ANAPC11	0.735	cis
ANAPC13	1.858	cis_intra
ANAPC15	0.775	cis
ANAPC2	0.175	cis
ANAPC4	0.461	cis_intra
ANAPC5	0.754	cis_intra
ANG	1.893	cis
ANGEL1	0.777	cis_intra
ANGEL2	0.708	cis_intra
ANGPT1	0.337	cis_inter_intra
ANGPT2	0.377	cis_intra
ANGPTL6	1.193	cis
ANK1	0.169	cis_inter_intra
ANK3	0.089	cis_inter_intra
ANKAR	1.072	inter_intra
ANKDD1A	1.285	cis_intra
ANKDD1B	1.027	cis_intra
ANKEF1	0.936	cis_intra
ANKFY1	0.312	cis_inter_intra
ANKH	0.499	cis_inter_intra
ANKHD1	0.112	trans-intra
ANKIB1	0.207	cis_intra
ANKK1	1.162	cis
ANKLE1	1.437	cis
ANKLE2	0.847	cis_intra
ANKMY1	1.214	cis_inter_intra
ANKMY2	0.924	cis
ANKRA2	1.069	cis
ANKRD1	1.336	trans-intra
ANKRD10	0.616	cis
ANKRD11	0.107	cis_inter_intra
ANKRD12	0.197	cis_inter_intra
ANKRD13A	0.571	cis
ANKRD13C	0.248	cis_inter_intra
ANKRD13D	0.428	cis
ANKRD16	1.385	trans-intra
ANKRD17	0.062	inter_intra
ANKRD22	1.718	cis_inter
ANKRD23	1.878	cis
ANKRD24	0.901	cis_inter_intra
ANKRD26	0.733	cis_intra
ANKRD27	1.105	cis_inter_intra
ANKRD28	0.171	cis_intra
ANKRD33	1.875	cis
ANKRD33B	0.552	cis_intra
ANKRD34A	0.247	cis
ANKRD34B	1.888	cis
ANKRD35	1.081	cis
ANKRD36	1.43	cis
ANKRD40	0.561	cis
ANKRD42	1.229	cis_intra
ANKRD44	0.527	cis_inter_intra
ANKRD50	0.305	cis_intra
ANKRD53	1.365	trans-intra
ANKRD54	0.829	cis
ANKRD55	0.867	cis_inter_intra
ANKRD6	0.908	cis_inter_intra
ANKRD61	1.146	trans-intra
ANKRD9	1.194	cis
ANKS1A	0.338	cis_inter_intra
ANKS3	0.726	cis_inter
ANKS6	0.694	cis_inter_intra
ANLN	0.374	trans-intra
ANO10	1.129	cis_inter_intra
ANO5	0.949	cis_intra
ANO6	1.141	inter_intra
ANO7	1.371	cis
ANO8	0.317	cis_intra
ANO9	0.911	cis
ANP32A	0.218	cis
ANP32B	0.331	cis
ANPEP	0.638	cis
ANTXR1	0.3	trans-intra
ANTXR2	0.503	inter_intra
ANTXRL	0.93	cis_inter_intra
ANXA1	1.03	cis_intra
ANXA11	0.98	cis_intra
ANXA2	0.808	cis_intra
ANXA2R	NA	cis
ANXA3	1.264	cis_intra
ANXA4	1.016	cis_inter_intra
ANXA5	1.446	cis
ANXA6	0.714	cis
ANXA7	0.936	trans-intra
AOAH	0.951	cis_inter_intra
AOC1	0.969	cis
AOC2	1.255	cis
AOX1	0.936	cis_inter_intra
AP003068.23	1.953	cis
AP003774.4	1.725	cis
AP006621.5	NA	cis
AP1AR	0.559	cis_intra
AP1B1	0.263	cis_intra
AP1G1	0.202	cis_intra
AP1G2	1.234	cis
AP1M1	0.404	cis_inter_intra
AP1M2	1.076	cis
AP1S1	0.862	cis
AP1S2	0.454	cis
AP1S3	1.079	cis_intra
AP2A1	0.101	cis_intra
AP2A2	0.108	cis_inter_intra
AP2B1	0.263	cis_inter_intra
AP2M1	0.19	cis
AP2S1	0.502	cis
AP3B1	0.344	cis_inter_intra
AP3B2	0.342	cis_intra
AP3D1	0.296	cis_inter_intra
AP3M1	0.644	cis_intra
AP3M2	1.112	cis
AP3S1	1.599	trans-intra
AP3S2	1.427	cis
AP4B1	0.827	cis
AP4E1	0.431	cis_intra
AP4M1	1.313	cis
AP4S1	1.633	cis_intra
AP5B1	1.239	cis
AP5M1	1.091	trans-intra
AP5S1	1.787	cis
AP5Z1	1.469	cis
APAF1	0.464	trans-intra
APBA1	0.388	inter_intra
APBA2	0.384	cis_intra
APBA3	1.239	cis_inter_intra
APBB1IP	0.371	cis
APBB2	0.44	cis_inter_intra
APBB3	0.974	cis
APC	0.161	cis_intra
APC2	0.225	trans-inter
APCDD1	0.681	cis
APEH	0.829	cis
APH1B	1.737	cis
API5	0.144	cis_intra
APIP	1.742	cis_inter_intra
APLF	1.528	inter_intra
APLP2	0.393	cis_intra
APMAP	1.294	cis_intra
APOA2	1.718	cis
APOBEC2	1.065	cis_intra
APOBEC3A	1.168	cis
APOBEC3B	1.358	cis
APOBEC3C	0.943	cis
APOBEC3D	1.657	cis
APOBEC3F	1.019	cis
APOBEC3G	1.667	cis
APOBEC3H	1.017	cis
APOBR	0.767	cis
APOL1	1.725	cis
APOL2	1.834	cis
APOL3	1.788	trans-intra
APOL4	1.555	cis
APOLD1	1.74	cis_intra
APOM	1.191	cis
APOO	0.548	cis
APOOL	1.002	cis
APP	0.419	cis_inter_intra
APPBP2	0.271	trans-intra
APPL1	0.35	inter_intra
APPL2	1.089	cis_intra
APRT	1.958	cis
APTX	1.3	cis_inter_intra
AQP10	1.109	cis
AQP11	1.347	cis
AQP3	0.644	cis
AQP9	0.661	cis_intra
AQR	0.219	cis_inter_intra
ARAF	0.33	cis
ARAP1	0.353	cis_inter
ARAP2	0.561	cis_inter_intra
ARAP3	0.433	cis
ARC	0.491	cis
ARCN1	0.101	cis
AREG	0.823	cis
AREL1	0.6	trans-inter
ARF1	0.402	cis_intra
ARF3	0.716	cis
ARF4	0.298	cis
ARFGAP1	0.599	cis_inter
ARFGAP2	0.54	cis
ARFGAP3	0.944	cis_intra
ARFGEF1	0.143	inter_intra
ARFGEF2	0.249	cis_intra
ARFIP1	0.941	cis
ARFIP2	0.429	cis
ARFRP1	0.641	cis
ARG1	0.917	cis
ARGLU1	0.394	cis_inter
ARHGAP1	0.409	cis
ARHGAP10	0.932	inter_intra
ARHGAP11A	0.742	cis
ARHGAP12	0.596	cis_intra
ARHGAP15	0.903	cis_inter_intra
ARHGAP17	0.442	cis_intra
ARHGAP18	0.859	cis_intra
ARHGAP19	1.097	cis_inter_intra
ARHGAP21	0.203	trans-intra
ARHGAP22	0.921	cis_inter_intra
ARHGAP23	0.22	inter_intra
ARHGAP24	0.833	cis_inter_intra
ARHGAP25	0.336	cis_inter_intra
ARHGAP26	0.276	cis_inter_intra
ARHGAP27	0.567	cis
ARHGAP29	0.249	cis_intra
ARHGAP31	0.192	cis_intra
ARHGAP32	0.254	cis_inter_intra
ARHGAP33	0.406	cis
ARHGAP35	0.057	cis_inter_intra
ARHGAP39	0.449	cis
ARHGAP42	0.155	cis_inter_intra
ARHGAP44	0.22	cis_inter_intra
ARHGAP5	0.263	cis_intra
ARHGAP6	0.228	cis_inter_intra
ARHGAP8	1.751	cis_inter_intra
ARHGAP9	0.836	cis_intra
ARHGDIB	1.297	trans-intra
ARHGDIG	0.367	trans-intra
ARHGEF1	0.342	cis_intra
ARHGEF10	0.976	cis_inter_intra
ARHGEF10L	0.442	inter_intra
ARHGEF11	0.215	cis_intra
ARHGEF12	0.179	inter_intra
ARHGEF17	0.293	cis
ARHGEF18	0.455	cis_inter_intra
ARHGEF19	1.151	cis
ARHGEF25	0.851	cis
ARHGEF26	0.99	cis_intra
ARHGEF28	0.704	trans-intra
ARHGEF3	0.515	cis_inter_intra
ARHGEF37	1.07	trans-intra
ARHGEF39	1.278	cis
ARHGEF4	0.553	trans-intra
ARHGEF40	0.5	cis
ARHGEF5	0.983	cis
ARHGEF6	0.136	cis
ARHGEF7	0.187	cis_inter
ARHGEF9	0.151	trans-intra
ARID1A	0.071	cis_inter_intra
ARID1B	0.102	cis_inter_intra
ARID2	0.096	cis_inter_intra
ARID3A	0.276	cis_intra
ARID3B	0.472	cis_inter_intra
ARID4A	0.139	trans-intra
ARID4B	0.187	inter_intra
ARID5A	0.35	cis
ARID5B	0.11	inter_intra
ARIH1	0.166	inter_intra
ARIH2	0.283	cis
ARL1	0.696	cis_intra
ARL11	1.886	cis
ARL13B	1.037	trans-intra
ARL14EP	0.693	cis
ARL15	1.196	cis_inter_intra
ARL16	1.867	cis
ARL17B	1.835	cis_intra
ARL3	1.097	cis_inter
ARL4D	1.197	cis
ARL5A	0.798	cis_intra
ARL5B	1.048	cis
ARL6IP1	0.777	cis
ARL6IP4	0.95	cis
ARL6IP5	1.254	cis
ARL8A	0.354	cis
ARL8B	0.649	cis
ARL9	0.862	cis
ARMC1	0.466	cis
ARMC10	1.097	cis
ARMC12	1.053	cis
ARMC2	0.79	cis_intra
ARMC5	0.491	cis
ARMC6	1.241	cis_intra
ARMC7	1.214	cis
ARMC8	0.172	trans-intra
ARMCX4	0.122	cis_intra
ARNT	0.279	cis_inter
ARNT2	0.291	cis_inter_intra
ARNTL	0.277	cis_inter_intra
ARNTL2	0.878	inter_intra
ARPC1A	0.416	cis
ARPC1B	0.645	cis
ARPC2	0.168	cis_inter_intra
ARPC3	0.683	cis
ARPC4	0.265	cis
ARPC5	0.526	cis
ARPC5L	0.718	trans-intra
ARPP19	0.608	cis_intra
ARRB1	0.262	cis_intra
ARRB2	0.444	cis_inter
ARRDC1	1.198	cis
ARRDC2	1.282	cis
ARRDC4	1.128	trans-intra
ARRDC5	1.454	cis_inter
ARSA	1.34	cis
ARSB	1.062	trans-intra
ARSD	0.858	cis
ARSG	1.147	cis_inter_intra
ART4	1.072	trans-intra
ARV1	1.255	cis_intra
ARVCF	0.823	cis_inter
AS3MT	1.306	cis
ASAH1	1.18	cis_intra
ASAH2B	1.697	cis
ASAP1	0.188	cis_inter_intra
ASAP3	0.711	cis_intra
ASB1	0.939	cis
ASB13	1.778	cis_intra
ASB14	1.691	cis
ASB16	1.587	cis
ASB2	1.218	trans-intra
ASB3	0.899	inter_intra
ASB6	0.971	cis
ASB7	0.28	cis_intra
ASB8	1.327	cis
ASB9	0.578	cis
ASCC1	1.317	cis
ASCC2	0.446	cis_intra
ASCC3	0.568	cis_inter_intra
ASCL2	1.819	cis
ASF1A	0.485	cis_inter_intra
ASF1B	1.531	cis
ASGR1	1.737	cis_intra
ASGR2	1.53	cis_intra
ASH1L	0.062	inter_intra
ASIC1	0.344	trans-intra
ASIC3	0.828	cis
ASL	0.936	cis
ASMT	1.934	cis
ASMTL	0.997	cis_intra
ASNA1	0.352	cis
ASNS	0.74	cis_intra
ASNSD1	1.47	cis_intra
ASPDH	1.409	cis
ASPH	0.821	cis_intra
ASPHD2	0.541	cis
ASPM	0.743	trans-intra
ASPRV1	1.288	cis
ASPSCR1	0.966	cis_intra
ASRGL1	1.391	cis_inter
ASS1	0.984	cis_intra
ASTE1	1.138	cis
ASTL	1.132	cis
ASTN2	0.246	cis_inter_intra
ASXL1	0.794	cis_inter
ASXL2	0.146	inter_intra
ATAD2	0.273	cis_intra
ATAD2B	0.155	trans-intra
ATAD3A	0.827	cis
ATAD3B	1.477	cis_inter
ATAD3C	1.174	cis
ATAT1	0.816	cis
ATE1	0.479	cis_intra
ATF1	0.477	cis_intra
ATF2	0.283	trans-intra
ATF3	0.893	trans-intra
ATF4	1.091	cis
ATF5	0.78	cis
ATF6	0.698	cis_inter_intra
ATF6B	0.7	cis_inter
ATF7	0.205	trans-intra
ATF7IP	0.213	cis_intra
ATF7IP2	0.471	cis_inter_intra
ATG10	1.356	cis_inter_intra
ATG12	1.74	cis
ATG13	0.328	cis_inter
ATG14	0.465	cis_intra
ATG16L1	0.319	cis_inter_intra
ATG16L2	1.08	trans-intra
ATG2B	0.435	cis_intra
ATG4A	0.262	cis_intra
ATG4B	0.337	cis
ATG4C	1.405	cis_intra
ATG4D	0.717	cis
ATG5	0.295	cis_inter_intra
ATG7	0.936	cis_inter_intra
ATG9B	1.107	cis
ATIC	1.248	cis_intra
ATL1	0.308	cis_intra
ATL3	0.904	cis_intra
ATM	0.71	cis_intra
ATMIN	0.771	cis
ATN1	0.194	trans-intra
ATOH8	0.379	cis
ATOX1	1.065	cis
ATP10A	0.427	cis_intra
ATP10D	0.787	cis_inter_intra
ATP11A	0.467	cis_inter
ATP11B	0.406	cis_intra
ATP11C	0.232	cis_inter_intra
ATP13A1	0.294	cis
ATP13A2	0.584	cis
ATP13A3	0.22	cis_inter_intra
ATP13A4	0.947	cis_inter_intra
ATP1A2	0.495	cis_intra
ATP1A3	0.062	cis_intra
ATP1A4	0.938	cis
ATP1B1	0.153	cis
ATP1B2	0.624	cis
ATP1B3	0.683	cis_intra
ATP2A1	0.833	cis
ATP2A2	0.246	trans-inter
ATP2A3	0.655	cis
ATP2B4	0.444	cis_inter_intra
ATP2C1	0.182	trans-intra
ATP2C2	1.838	cis_intra
ATP5A1	0.182	cis
ATP5C1	0.812	cis
ATP5D	1.457	cis
ATP5F1	0.867	cis
ATP5G1	0.891	cis
ATP5G2	1.659	cis_intra
ATP5G3	0.826	cis
ATP5H	1.387	cis
ATP5L	1.55	cis
ATP5O	0.777	cis
ATP5SL	1.367	cis_intra
ATP6AP1L	0.915	cis_intra
ATP6V0A1	0.268	cis_inter_intra
ATP6V0A2	0.748	cis_inter
ATP6V0B	0.278	cis
ATP6V0D1	0.268	cis
ATP6V0E1	0.943	trans-intra
ATP6V0E2	1.189	cis
ATP6V1A	0.358	cis_intra
ATP6V1B2	0.287	trans-intra
ATP6V1C1	0.765	cis_intra
ATP6V1D	0.894	cis_intra
ATP6V1E1	0.514	cis_intra
ATP6V1E2	1.229	cis_intra
ATP6V1G1	1.252	cis
ATP6V1G2	1.238	cis
ATP6V1H	0.631	cis_inter_intra
ATP7A	0.216	trans-intra
ATP7B	1.188	cis_intra
ATP8A1	0.346	cis_inter_intra
ATP8B1	0.56	trans-intra
ATP8B2	0.407	cis
ATP8B3	1.011	cis
ATP8B4	1.094	cis_inter_intra
ATP9A	0.205	cis_inter_intra
ATP9B	0.689	cis_inter_intra
ATPAF1	0.716	cis_intra
ATPAF2	1.438	cis_intra
ATPIF1	1.763	cis
ATR	0.399	trans-inter
ATRIP	0.637	cis_intra
ATRN	0.195	cis_inter_intra
ATRX	0.119	inter_intra
ATXN1	0.316	cis_inter_intra
ATXN10	0.697	cis_inter_intra
ATXN1L	0.305	inter_intra
ATXN2	0.333	inter_intra
ATXN2L	0.143	cis
ATXN3	0.492	cis
ATXN7	0.328	trans-intra
ATXN7L1	0.221	cis_inter_intra
ATXN7L2	0.377	cis
AUH	0.964	cis_inter_intra
AURKAIP1	1.77	cis
AURKB	0.732	cis
AURKC	0.726	cis
AUTS2	0.253	cis_inter_intra
AVEN	1.414	cis_inter_intra
AVIL	0.778	trans-intra
AVL9	0.533	cis_intra
AVP	1.452	cis
AXIN1	0.403	cis_inter
AXIN2	0.396	cis_inter
AXL	0.437	trans-intra
AZI2	0.687	cis_inter
AZIN1	0.237	cis_inter
B2M	0.709	cis
B3GALNT1	0.999	trans-intra
B3GALNT2	0.843	cis_intra
B3GALT2	0.39	cis_intra
B3GALT6	1.425	cis
B3GAT1	0.643	cis
B3GAT2	1.352	cis_inter_intra
B3GAT3	1.331	cis
B3GNT2	0.413	cis_intra
B3GNT3	0.541	cis
B3GNT4	1.502	cis
B3GNT5	0.485	cis_intra
B3GNT7	0.495	cis
B3GNT8	1.538	cis
B3GNT9	1.792	cis
B3GNTL1	1.795	cis_intra
B4GALNT3	0.775	cis_inter
B4GALNT4	0.578	cis
B4GALT1	0.704	cis_inter_intra
B4GALT4	1.137	cis
B4GALT5	0.151	cis_inter
B4GALT6	0.371	trans-intra
B4GALT7	1.11	cis_intra
B9D1	0.952	trans-intra
BAALC	1.549	cis_intra
BABAM1	0.324	cis
BACE1	0.374	cis
BACE2	0.689	cis_inter
BACH1	0.432	cis_inter_intra
BACH2	0.233	inter_intra
BAG2	1.151	cis_inter
BAG3	0.447	cis
BAG4	0.747	cis
BAG5	1.159	cis
BAG6	0.174	cis_inter
BAHD1	0.3	cis_intra
BAIAP2	0.429	cis_inter_intra
BAIAP2L1	0.649	cis_intra
BAIAP2L2	1.097	cis_inter_intra
BAIAP3	1.035	cis
BAK1	1.369	cis
BAMBI	1.241	cis_intra
BANF1	0.872	cis
BANK1	0.829	inter_intra
BANP	0.273	cis_inter_intra
BARD1	1.358	cis_intra
BASP1	0.774	cis_inter_intra
BATF	0.473	cis
BATF2	1.068	cis
BATF3	1.27	cis
BAX	0.751	cis
BAZ1A	0.176	inter_intra
BAZ1B	0.109	inter_intra
BAZ2A	0.146	trans-intra
BAZ2B	0.288	cis_inter_intra
BBC3	1.589	cis
BBIP1	1.571	cis
BBS1	0.981	cis
BBS10	1.357	cis
BBS12	0.963	trans-intra
BBS2	1.066	cis
BBS4	1.184	cis
BBS7	0.735	cis_intra
BBS9	0.842	cis_inter_intra
BBX	0.37	cis_inter_intra
BCAM	0.835	trans-intra
BCAP31	0.65	cis
BCAR1	0.246	cis
BCAR3	0.383	inter_intra
BCAS1	0.86	inter_intra
BCAS2	1.329	cis
BCAS3	0.467	cis_inter_intra
BCAS4	1.557	cis_intra
BCAT1	1.022	cis_intra
BCAT2	1.22	cis
BCCIP	0.784	trans-intra
BCDIN3D	1.321	cis
BCKDHA	1.032	cis
BCKDHB	1.103	cis_inter_intra
BCKDK	0.867	cis
BCL10	0.731	cis
BCL11A	0.322	trans-intra
BCL11B	0.282	inter_intra
BCL2	0.712	inter_intra
BCL2L1	0.341	trans-intra
BCL2L11	0.42	trans-intra
BCL2L13	0.803	cis_inter_intra
BCL2L15	1.097	cis
BCL3	0.221	cis
BCL7A	0.725	cis
BCL7B	0.714	cis
BCL7C	0.723	cis_inter_intra
BCL9	0.381	trans-inter
BCL9L	0.242	cis_inter
BCO2	1.277	cis_intra
BCOR	0.141	cis_inter
BCORL1	0.152	cis
BCR	0.296	cis_inter_intra
BDH1	1.39	cis_inter_intra
BDH2	1.375	cis_intra
BDP1	0.596	cis_intra
BEAN1	1.677	cis_intra
BECN1	0.347	cis
BEGAIN	0.32	cis
BEND2	0.544	cis_intra
BEND3	0.347	cis_intra
BEND4	0.292	cis_intra
BEND5	0.658	trans-intra
BEND7	0.7	cis_inter
BEST1	1.489	cis
BET1	1.602	trans-intra
BET1L	1.55	cis
BEX1	1.216	cis
BEX2	1.271	cis
BEX4	0.821	cis_intra
BEX5	1.943	cis
BFAR	0.993	cis_intra
BFSP1	1.119	cis_intra
BFSP2	1.038	trans-inter
BGLAP	1.954	cis
BICD1	0.571	cis_inter_intra
BICD2	0.305	cis
BIK	1.914	cis
BIN1	0.368	cis
BIN2	0.973	cis_intra
BIN3	1.597	cis_inter
BIRC2	0.435	cis
BIRC3	0.519	cis
BIRC5	1.043	cis
BIRC6	0.104	trans-intra
BIRC7	1.342	cis
BIVM	0.672	cis
BLK	1.168	cis_intra
BLM	0.751	cis_inter_intra
BLMH	0.482	cis_intra
BLNK	0.391	trans-intra
BLOC1S1	0.963	cis
BLOC1S2	1.178	cis
BLOC1S3	1.913	cis
BLOC1S5	1.808	cis_intra
BLOC1S6	1.688	trans-intra
BLVRA	0.922	cis_intra
BLVRB	1.758	cis
BLZF1	1.007	cis
BMP1	0.456	cis
BMP2	0.224	cis_intra
BMP2K	0.381	cis_inter_intra
BMP6	0.411	cis_inter_intra
BMP8A	1.348	cis
BMP8B	1.269	cis
BMPR1A	0.355	cis_intra
BMPR2	0.191	cis_intra
BMS1	0.448	cis_intra
BNC2	0.34	cis_inter_intra
BNIP1	1.245	cis
BNIP2	0.852	cis_intra
BNIP3	1.462	cis
BNIP3L	0.757	cis_intra
BNIPL	1.203	cis
BOD1L1	0.254	cis
BOK	1.017	cis
BOLA1	1.777	cis
BORA	0.701	cis
BPHL	1.349	cis
BPI	1.252	cis_inter
BPTF	0.099	cis_inter_intra
BRAF	0.209	inter_intra
BRAT1	0.995	cis
BRCA1	0.915	cis_intra
BRCA2	0.635	cis_intra
BRCC3	0.813	cis
BRD1	0.245	cis_intra
BRD2	0.219	cis_intra
BRD3	0.316	cis
BRD4	0.048	cis_inter_intra
BRD7	0.258	cis
BRD8	0.516	trans-intra
BRD9	0.522	cis
BRE	0.468	inter_intra
BRF1	0.602	cis_inter
BRI3	1.814	cis_intra
BRI3BP	0.994	cis
BRICD5	1.95	cis
BRIP1	0.786	trans-intra
BRK1	0.785	cis
BRMS1L	0.576	trans-intra
BROX	1.058	cis
BRPF1	0.176	cis
BRPF3	0.177	trans-intra
BRSK1	0.205	cis_intra
BRSK2	0.329	cis
BRWD1	0.222	cis_inter_intra
BRWD3	0.084	cis_intra
BSCL2	1.008	cis
BSDC1	0.584	cis
BSG	0.964	cis
BSN	0.175	trans-intra
BSND	1.78	cis
BSPRY	1.201	cis
BST1	1.358	cis_intra
BST2	1.409	cis
BTAF1	0.128	trans-intra
BTBD1	0.788	trans-intra
BTBD10	0.612	cis
BTBD11	0.204	cis_inter_intra
BTBD17	0.783	cis
BTBD19	0.666	cis
BTBD2	0.388	cis_intra
BTBD3	0.569	cis_intra
BTBD6	1.063	cis
BTBD7	0.51	cis_intra
BTBD8	1.132	trans-inter
BTBD9	0.866	cis_inter_intra
BTD	1.304	cis_intra
BTF3	0.527	cis
BTG1	0.738	cis
BTG2	1.506	cis
BTK	0.103	cis_intra
BTLA	0.787	trans-inter
BTN2A1	1.829	cis_intra
BTN2A2	1.214	cis_intra
BTN3A1	1.193	cis_intra
BTN3A2	1.415	cis_intra
BTN3A3	1.667	cis
BTNL3	0.847	cis
BTNL8	1.044	cis
BTNL9	1.349	cis
BTRC	0.456	inter_intra
BUB1B	0.58	cis
BUD13	0.774	cis
BYSL	0.806	cis
BZW1	0.347	cis
BZW2	0.532	cis_intra
C10orf105	1.906	cis
C10orf11	1.198	cis_inter_intra
C10orf128	1.435	cis_intra
C10orf55	1.936	trans-intra
C10orf76	0.573	cis_inter
C10orf88	0.721	cis
C10orf91	1.835	cis
C11orf21	1.078	cis
C11orf24	1.756	cis
C11orf49	1.285	inter_intra
C11orf54	1.518	cis
C11orf57	0.614	trans-intra
C11orf58	0.739	inter_intra
C11orf63	0.92	cis_intra
C11orf65	1.75	cis_inter_intra
C11orf71	1.502	trans-intra
C11orf74	1.655	cis
C11orf80	0.962	cis_intra
C11orf84	0.21	cis
C12orf4	0.67	trans-intra
C12orf42	1.856	inter_intra
C12orf43	1.41	cis
C12orf45	1.224	trans-intra
C12orf49	1.028	cis
C12orf57	1.863	cis
C12orf60	1.685	cis_inter_intra
C12orf65	0.907	cis
C12orf66	0.548	cis_intra
C12orf73	1.879	cis
C12orf75	0.904	cis_intra
C12orf76	1.906	trans-intra
C14orf1	0.853	cis
C14orf119	1.415	cis
C14orf132	NA	cis
C14orf159	1.548	cis_intra
C14orf166	0.59	cis
C14orf2	0.553	cis
C14orf79	1.727	cis
C14orf93	0.646	cis_intra
C15orf39	0.575	cis
C15orf40	0.956	cis
C15orf41	1.055	cis_inter_intra
C15orf48	1.856	cis
C15orf53	1.923	cis
C15orf57	0.685	cis
C15orf62	1.229	trans-inter
C15orf65	1.29	cis
C16orf45	0.782	cis_inter_intra
C16orf46	1.627	cis_intra
C16orf52	0.823	cis_inter_intra
C16orf54	1.006	trans-intra
C16orf62	0.573	cis_inter_intra
C16orf70	0.308	cis_inter_intra
C16orf74	1.387	cis_inter_intra
C16orf86	1.043	cis
C16orf89	1.702	trans-intra
C16orf95	1.805	cis_inter_intra
C16orf96	1.076	trans-inter
C17orf100	1.795	cis_intra
C17orf107	1.495	cis
C17orf51	1.196	cis_intra
C17orf62	1.312	cis
C17orf67	1.897	cis
C17orf75	0.483	cis
C17orf80	1.028	cis_intra
C17orf97	1.969	cis
C17orf99	0.791	cis_intra
C18orf25	0.394	cis_intra
C18orf32	1.534	cis
C18orf54	1.155	cis
C18orf8	0.297	cis
C19orf12	1.057	cis
C19orf18	1.595	cis
C19orf24	1.954	cis
C19orf33	0.746	cis
C19orf35	1.775	cis
C19orf44	1.111	cis_intra
C19orf45	1.776	cis
C19orf47	0.611	cis
C19orf48	NA	cis
C19orf53	1.611	cis
C19orf54	1.199	cis
C19orf57	0.775	cis
C19orf60	1.443	cis
C19orf66	0.641	cis
C19orf68	0.325	trans-intra
C19orf70	1.63	cis
C19orf71	1.86	cis
C19orf84	1.82	cis
C1GALT1	0.466	cis_intra
C1GALT1C1	0.478	cis
C1orf100	1.537	cis
C1orf101	0.774	cis_intra
C1orf106	0.733	cis
C1orf109	1.396	cis
C1orf112	0.73	cis_inter_intra
C1orf115	1.753	cis
C1orf116	0.729	cis
C1orf122	1.756	cis
C1orf123	1.426	cis
C1orf145	1.847	cis
C1orf147	1.921	cis
C1orf159	1.302	cis
C1orf162	1.82	cis
C1orf174	1.405	cis
C1orf186	1.609	cis
C1orf194	1.765	cis
C1orf198	1.016	trans-intra
C1orf204	1.832	cis
C1orf21	0.414	cis_inter_intra
C1orf216	1.481	cis
C1orf220	1.394	cis
C1orf226	0.337	cis
C1orf228	0.88	cis_inter_intra
C1orf27	0.949	trans-intra
C1orf50	0.944	cis
C1orf53	1.855	cis
C1orf61	1.853	trans-intra
C1orf74	1.098	cis
C1QA	1.153	cis
C1QB	1.044	cis
C1QBP	1.467	cis
C1QL3	0.763	cis
C1QTNF1	1.093	trans-intra
C1QTNF3	1.28	cis
C1QTNF4	0.991	cis
C1QTNF6	1.623	cis_inter
C1R	0.39	cis
C1RL	1.156	cis
C1S	0.596	inter_intra
C2	1.027	cis_inter_intra
C20orf194	0.6	cis_intra
C20orf196	1.007	cis_inter_intra
C20orf197	1.644	cis_intra
C20orf202	1.809	cis
C20orf27	1.293	cis_intra
C20orf96	1.367	cis
C21orf2	1.396	cis
C21orf58	1.695	cis
C21orf91	0.957	cis
C22orf15	1.245	cis
C22orf24	1.734	cis_intra
C22orf29	NA	cis
C22orf34	1.704	cis_inter_intra
C22orf39	1.77	cis
C22orf46	1.758	trans-intra
C2CD2	0.679	cis_inter
C2CD2L	0.297	cis
C2CD3	0.644	inter_intra
C2CD5	0.705	cis_inter_intra
C2orf15	1.063	cis
C2orf27A	1.813	cis
C2orf40	1.423	cis
C2orf42	0.578	cis
C2orf49	1.062	cis
C2orf61	1.143	cis
C2orf69	0.805	cis_intra
C2orf74	1.109	cis
C2orf76	1.473	cis
C2orf82	1.016	trans-intra
C2orf88	1.939	cis_inter_intra
C3	0.305	cis_intra
C3AR1	1.585	cis
C3orf14	1.804	cis
C3orf18	1.694	cis_intra
C3orf20	1.144	cis_inter_intra
C3orf33	1.412	cis_intra
C3orf35	1.683	cis_intra
C3orf38	1.02	cis
C3orf52	1.795	cis
C4A	1.446	cis_intra
C4B	0.406	cis
C4BPA	0.43	cis_intra
C4orf19	1.887	cis_inter_intra
C4orf3	0.761	cis
C4orf32	0.852	cis
C4orf33	1.34	cis
C4orf36	1.901	cis_intra
C5	0.695	cis_intra
C5AR1	1.698	cis
C5orf22	0.769	cis
C5orf24	0.691	cis_intra
C5orf30	0.89	cis
C5orf34	1.075	cis
C5orf42	0.674	cis_intra
C5orf56	1.911	cis_intra
C5orf58	1.703	cis
C5orf63	1.905	cis_intra
C5orf66	1.749	cis_inter_intra
C6orf106	0.419	cis_inter_intra
C6orf120	NA	cis
C6orf136	0.346	cis
C6orf163	0.991	cis_intra
C6orf201	1.406	cis_inter_intra
C6orf222	1.318	cis_intra
C6orf223	1.757	cis
C6orf229	1.511	cis
C6orf47	0.984	cis
C6orf48	1.886	cis_inter_intra
C6orf52	1.659	trans-intra
C6orf62	0.24	cis
C6orf89	1.087	cis_inter_intra
C6orf99	1.806	trans-intra
C7orf25	0.588	cis
C7orf26	0.298	cis
C7orf31	1.016	cis_intra
C7orf34	1.868	cis
C7orf43	0.494	cis
C7orf49	1.305	cis_inter_intra
C7orf50	1.787	cis_inter_intra
C7orf71	1.817	cis
C7orf73	1.187	cis
C8B	1.334	cis_intra
C8G	1.929	cis
C8orf31	1.887	cis
C8orf33	1.837	cis
C8orf37	1.423	cis
C8orf4	1.796	trans-intra
C8orf46	0.795	cis_intra
C8orf58	1.055	cis
C8orf59	1.818	cis
C8orf76	1.611	cis
C8orf82	1.897	cis
C9orf139	1.945	cis
C9orf142	1.06	cis
C9orf152	1.051	cis
C9orf16	1.916	cis
C9orf163	NA	cis
C9orf3	0.939	cis_inter_intra
C9orf40	1.491	cis
C9orf43	1.055	cis
C9orf47	1.771	trans-intra
C9orf64	1.237	cis
C9orf72	0.928	cis_intra
C9orf78	1.004	cis
C9orf84	0.846	inter_intra
C9orf85	1.682	trans-intra
CA1	1.682	trans-intra
CA11	0.79	cis
CA13	1.163	cis_intra
CA2	1.373	cis
CA3	0.85	trans-intra
CA4	1.149	cis
CA6	0.917	cis_intra
CA8	0.67	cis
CAAP1	0.455	cis_intra
CAB39	0.633	cis
CAB39L	1.003	cis_inter_intra
CABIN1	0.586	cis_inter_intra
CABLES1	0.63	cis_inter_intra
CABLES2	0.842	cis
CABP1	0.396	cis
CABP5	1.092	cis
CABP7	0.765	cis
CABYR	1.129	cis_intra
CACFD1	1.235	cis
CACHD1	0.572	cis_intra
CACNA1A	0.134	cis_inter_intra
CACNA1D	0.214	cis_inter_intra
CACNA1E	0.124	cis_inter_intra
CACNA1F	0.448	cis
CACNA1H	0.504	cis_inter_intra
CACNA1I	0.202	cis_inter_intra
CACNA2D2	0.229	trans-inter
CACNA2D3	0.337	inter_intra
CACNA2D4	1.011	cis_inter_intra
CACNB1	0.376	cis_intra
CACNB2	0.692	cis_inter_intra
CACNB3	0.644	cis
CACNB4	0.491	cis_intra
CACNG6	1.69	trans-intra
CACNG8	0.289	cis_intra
CACTIN	0.136	cis
CACUL1	0.33	cis_intra
CACYBP	0.38	cis_intra
CADM1	0.436	cis_inter_intra
CADM3	0.355	trans-intra
CADM4	0.169	cis
CALB1	0.511	trans-intra
CALB2	1.02	cis_intra
CALCOCO2	0.65	cis_intra
CALCRL	0.298	cis_intra
CALD1	0.258	inter_intra
CALHM2	1.638	cis
CALM1	0.327	cis
CALM3	0.357	cis
CALML4	1.547	cis
CALML6	1.757	cis
CALR	0.38	cis_intra
CALU	0.711	cis
CAMK1	0.818	cis
CAMK1D	0.228	cis_inter_intra
CAMK2A	0.251	trans-intra
CAMK2B	0.364	cis_intra
CAMK2D	0.539	cis_inter_intra
CAMK2G	0.241	trans-intra
CAMK4	0.474	cis_inter_intra
CAMKK1	0.634	cis_inter_intra
CAMKK2	0.47	cis
CAMKMT	1.523	inter_intra
CAMLG	1.019	cis
CAMSAP1	0.239	cis_inter_intra
CAMSAP2	0.203	cis_intra
CAMSAP3	0.154	cis_intra
CAMTA1	0.172	cis_inter_intra
CAMTA2	0.262	cis_intra
CAND2	0.939	cis_intra
CANT1	1.309	cis
CANX	0.359	trans-intra
CAP1	0.547	cis
CAP2	0.407	inter_intra
CAPG	1.457	cis
CAPN1	0.706	cis
CAPN10	0.999	cis
CAPN11	1.151	cis
CAPN12	1.52	cis
CAPN13	1.126	trans-intra
CAPN15	0.316	cis
CAPN2	1.072	cis
CAPN3	0.965	cis
CAPN5	0.782	cis
CAPN8	1.019	cis_intra
CAPNS1	1.113	cis_intra
CAPRIN1	0.311	cis_inter_intra
CAPRIN2	0.381	cis_inter_intra
CAPS	1.793	cis
CAPS2	1.297	cis_intra
CAPZA1	0.362	cis
CAPZA2	0.161	cis_intra
CAPZB	0.379	inter_intra
CARD11	0.227	cis_intra
CARD14	0.995	cis_intra
CARD16	0.973	cis
CARD17	1.833	cis
CARD8	0.878	cis_intra
CARD9	1.126	cis
CARF	0.703	cis_inter
CARHSP1	1.867	cis
CARM1	0.099	cis_intra
CARS	0.494	cis_intra
CARS2	0.84	cis_intra
CASC1	0.957	cis_intra
CASC3	0.379	cis_inter_intra
CASC4	0.742	cis_inter_intra
CASD1	0.435	trans-intra
CASK	0.073	cis_intra
CASKIN2	0.232	cis
CASP1	0.924	cis_intra
CASP2	0.658	cis
CASP3	0.686	cis
CASP4	1.169	cis_intra
CASP5	1.55	cis
CASP7	0.873	cis_intra
CASP8	0.811	cis
CASP9	0.974	cis_intra
CASQ1	1.576	cis_intra
CASQ2	1.375	trans-intra
CASS4	0.446	cis_intra
CAST	0.782	cis_inter_intra
CASZ1	0.152	trans-intra
CAT	1.054	cis
CATSPER2	1.224	cis
CATSPERB	0.867	cis_inter_intra
CATSPERG	0.857	cis_intra
CAV1	1.31	trans-intra
CAV2	1.343	cis_inter_intra
CBFA2T2	0.263	cis_inter_intra
CBFA2T3	0.5	cis_inter_intra
CBFB	0.33	cis_intra
CBL	0.503	cis_inter_intra
CBLB	0.266	cis_inter
CBLN3	1.287	cis
CBR1	1.533	cis
CBR3	1.804	cis
CBR4	1.696	cis_inter_intra
CBWD1	1.197	cis
CBWD2	0.819	cis
CBX1	0.26	cis
CBX4	0.285	cis
CBX6	0.262	cis
CBX7	0.505	cis
CC2D1A	0.42	cis
CC2D1B	0.917	cis
CC2D2A	0.781	cis_inter
CC2D2B	0.966	cis
CCAR2	0.323	cis
CCDC102A	0.846	cis
CCDC102B	1.294	cis_inter_intra
CCDC106	0.939	cis
CCDC107	1.718	cis
CCDC112	0.373	cis
CCDC114	0.962	cis
CCDC115	1.78	cis
CCDC116	1.24	cis
CCDC12	0.849	cis
CCDC122	1.247	cis
CCDC124	0.8	cis
CCDC125	1.027	cis_intra
CCDC126	1.176	cis_intra
CCDC127	1.071	cis
CCDC13	0.723	cis_intra
CCDC130	0.771	cis_intra
CCDC134	1.542	cis
CCDC136	0.722	cis_intra
CCDC137	1.313	cis_intra
CCDC138	0.913	trans-intra
CCDC14	0.973	inter_intra
CCDC146	1.072	cis_inter_intra
CCDC149	0.765	cis_intra
CCDC15	1.057	cis_intra
CCDC150	1.125	trans-intra
CCDC151	1.114	cis
CCDC152	1.324	cis
CCDC153	1.226	cis
CCDC154	1.151	cis
CCDC157	1.375	cis
CCDC159	0.897	cis
CCDC167	1.941	cis
CCDC17	1.405	cis
CCDC170	1.35	cis_inter_intra
CCDC174	0.863	cis
CCDC18	0.967	cis_intra
CCDC180	0.925	cis_intra
CCDC183	0.985	cis
CCDC22	0.123	cis
CCDC24	1.461	cis
CCDC25	0.764	cis
CCDC28A	1.647	cis
CCDC3	1.087	cis_inter_intra
CCDC30	0.928	cis_inter_intra
CCDC34	1.023	trans-intra
CCDC36	0.763	inter_intra
CCDC39	0.754	cis_inter_intra
CCDC40	0.845	cis_intra
CCDC42	1.066	cis_intra
CCDC47	0.875	cis_intra
CCDC50	0.744	cis_inter_intra
CCDC57	1.019	cis_inter_intra
CCDC58	1.137	cis_inter
CCDC59	1.699	trans-intra
CCDC6	0.43	cis_inter_intra
CCDC61	1.438	cis
CCDC62	1.083	cis_intra
CCDC66	1.215	cis_intra
CCDC69	1.283	cis
CCDC7	0.982	cis_inter_intra
CCDC71	0.755	cis
CCDC71L	1.092	cis
CCDC74A	1.863	cis
CCDC77	1.307	cis
CCDC78	1.788	cis
CCDC80	0.65	cis_intra
CCDC81	1.219	inter_intra
CCDC82	0.856	cis
CCDC84	1.272	cis
CCDC85C	0.473	inter_intra
CCDC88A	0.13	cis_inter_intra
CCDC88B	0.528	cis
CCDC88C	0.454	inter_intra
CCDC9	0.733	cis_intra
CCDC91	0.809	cis_inter_intra
CCDC92	0.619	cis_intra
CCDC93	0.605	cis_intra
CCDC94	1.095	cis
CCDC97	1.468	cis
CCHCR1	0.852	cis_intra
CCIN	0.655	cis
CCL20	1.875	cis
CCL22	1.804	cis
CCL23	1.72	cis
CCL24	1.84	cis
CCL28	1.654	cis
CCL3L3	1.863	cis
CCL4	1.372	cis
CCL4L2	1.898	cis
CCL5	1.818	cis
CCM2	0.66	cis_intra
CCNA1	0.68	cis
CCNB1	0.549	trans-intra
CCNB1IP1	1.126	cis
CCNB2	1.177	cis_intra
CCNB3	0.361	trans-intra
CCNC	0.146	cis
CCND2	0.229	cis_intra
CCND3	0.24	cis_intra
CCNE1	0.32	cis
CCNG2	0.756	cis_inter_intra
CCNH	0.809	cis
CCNJL	1.325	cis_inter_intra
CCNL1	0.264	cis
CCNT1	0.498	cis
CCNT2	0.346	cis
CCNY	0.417	cis_inter_intra
CCNYL1	0.494	cis_intra
CCP110	0.454	cis
CCPG1	0.564	trans-intra
CCR1	0.685	cis
CCR2	0.976	cis
CCR3	1.365	cis_inter_intra
CCR5	1.93	cis
CCR6	1.043	cis
CCR9	1.127	cis_intra
CCRL2	1.777	cis
CCS	1.373	cis_intra
CCSAP	0.849	cis
CCSER1	0.55	inter_intra
CCSER2	0.384	cis_inter_intra
CCT2	0.226	trans-intra
CCT3	0.097	cis
CCT4	0.218	cis
CCT5	0.188	cis
CCT6A	0.255	cis
CCT6B	1.123	cis_intra
CCT7	0.301	cis
CCT8	0.328	cis
CCZ1	0.922	cis
CCZ1B	1.293	cis
CD101	0.85	cis
CD109	1.189	cis_intra
CD14	1.592	cis
CD151	1.086	cis
CD163	0.443	cis
CD163L1	0.862	cis_inter_intra
CD164	0.613	cis
CD180	0.992	cis
CD1A	1.946	cis
CD1B	1.338	cis
CD1C	1.233	cis
CD1E	1.729	cis
CD2	0.624	trans-intra
CD200	0.56	trans-intra
CD200R1	1.366	cis
CD207	1.292	cis_intra
CD209	1.375	cis
CD22	0.349	cis_intra
CD226	0.698	cis_inter_intra
CD244	0.577	cis_intra
CD247	0.824	cis_intra
CD27	0.92	cis
CD274	0.801	cis
CD276	1.149	trans-inter
CD28	0.711	cis
CD2AP	0.413	cis_intra
CD300A	1.221	cis_intra
CD300C	1.571	cis
CD300E	0.973	cis
CD300LB	1.621	cis_inter
CD300LD	1.568	cis
CD300LF	1.441	cis
CD302	1.494	cis_intra
CD320	1.176	cis
CD33	1.319	cis_intra
CD36	1.995	cis_inter_intra
CD37	1.041	cis_intra
CD38	1.126	cis_intra
CD3E	0.923	cis
CD3EAP	1.831	cis
CD3G	1.219	cis
CD4	0.709	trans-intra
CD40	0.422	cis_intra
CD44	0.664	cis
CD46	0.896	trans-intra
CD47	0.373	cis
CD48	1.489	cis_intra
CD5	1.03	cis_inter
CD52	1.698	cis
CD55	1.273	cis
CD58	0.653	cis_intra
CD59	1.004	cis
CD5L	1.666	cis_intra
CD6	0.656	cis
CD63	0.817	cis
CD7	1.073	cis
CD70	1.746	cis
CD72	0.596	cis
CD81	0.381	cis
CD82	1.255	cis
CD83	1.07	cis_intra
CD84	1.317	cis_intra
CD86	0.345	cis_intra
CD8A	1.495	cis_intra
CD8B	1.425	cis_intra
CD9	0.86	cis
CD93	1.235	cis
CD96	0.97	cis_inter_intra
CD99	0.965	cis_intra
CD99L2	1.037	cis
CDA	1.318	cis_intra
CDADC1	1.1	cis
CDC123	0.811	cis
CDC14A	0.765	cis_intra
CDC14B	0.343	inter_intra
CDC16	0.379	cis
CDC25A	0.375	trans-intra
CDC25B	0.425	cis_inter
CDC25C	1.245	trans-intra
CDC26	0.85	cis
CDC27	0.273	inter_intra
CDC34	0.305	cis
CDC37	0.37	trans-intra
CDC37L1	0.326	cis
CDC40	0.31	cis_intra
CDC42	0.501	cis_intra
CDC42BPA	0.283	cis_inter_intra
CDC42BPB	0.12	cis_inter_intra
CDC42BPG	0.839	cis
CDC42EP1	1.729	cis
CDC42EP2	1.767	cis
CDC42EP3	0.957	trans-inter
CDC42EP4	0.901	cis
CDC42EP5	1.855	cis
CDC42SE2	0.618	cis_inter_intra
CDC5L	0.129	inter_intra
CDC7	0.797	cis
CDC73	0.188	trans-intra
CDCA2	1.04	trans-intra
CDCA3	0.504	trans-intra
CDCA4	1.383	cis
CDCA7L	0.675	cis_intra
CDCA8	0.683	cis
CDCP1	0.651	cis
CDH1	0.43	inter_intra
CDH13	0.594	cis_inter_intra
CDH2	0.29	cis_intra
CDH23	0.567	cis_inter_intra
CDH26	1.237	trans-intra
CDH4	0.364	cis_inter_intra
CDHR1	1.311	cis_intra
CDHR2	0.849	cis_intra
CDHR3	1.273	cis_inter_intra
CDHR5	1.277	cis
CDIP1	0.449	cis_inter_intra
CDIPT	0.794	cis
CDK10	1.453	cis
CDK11A	1.291	cis
CDK11B	0.678	cis
CDK12	0.126	cis_inter_intra
CDK13	0.324	cis_intra
CDK14	0.95	cis_inter_intra
CDK17	0.222	cis_intra
CDK19	0.163	cis_inter_intra
CDK2AP1	0.857	cis_inter
CDK3	1.259	cis
CDK4	0.642	cis
CDK5R1	0.378	cis
CDK5RAP1	1.356	cis_intra
CDK5RAP2	0.663	inter_intra
CDK5RAP3	1.081	cis
CDK6	0.282	trans-intra
CDK7	1.021	cis_inter
CDK9	0.954	cis
CDKAL1	0.52	cis_inter_intra
CDKL1	1.086	cis
CDKL3	1.148	trans-intra
CDKL5	0.226	inter_intra
CDKN1A	1.375	cis_inter
CDKN2A	0.949	cis
CDKN2AIPNL	1.062	cis
CDKN2B	1.833	cis
CDKN2D	1.394	cis_intra
CDKN3	0.833	cis
CDNF	1.791	cis
CDO1	0.927	cis
CDPF1	1.929	cis
CDR2	1.026	cis_intra
CDR2L	0.832	inter_intra
CDRT4	1.884	cis_intra
CDS1	0.653	trans-intra
CDS2	0.862	cis_inter_intra
CDT1	1.215	cis
CDV3	0.517	cis
CDYL	0.236	cis_intra
CDYL2	0.6	cis_inter_intra
CEACAM1	0.709	cis_intra
CEACAM19	1.576	cis_intra
CEACAM21	1.696	cis_intra
CEACAM3	1.52	cis
CEACAM4	1.417	cis
CEACAM5	0.989	trans-intra
CEACAM6	1.217	cis
CEACAM7	1.527	cis_intra
CEACAM8	1.206	trans-intra
CEBPA	1.177	cis
CEBPB	1.025	cis
CECR1	1.07	cis
CECR6	0.575	cis
CELA1	0.98	cis
CELA2A	1.83	trans-intra
CELA2B	1.112	cis
CELF1	0.171	cis_intra
CELF2	0.174	inter_intra
CELF6	0.645	cis_inter
CELSR1	0.25	cis_inter_intra
CELSR2	0.251	cis
CELSR3	0.245	trans-intra
CEND1	1.029	cis
CENPB	0.181	cis
CENPBD1	1.897	cis
CENPC	0.547	cis_inter_intra
CENPE	0.308	inter_intra
CENPF	0.733	trans-intra
CENPH	1.139	trans-intra
CENPI	0.169	trans-inter
CENPJ	0.972	trans-intra
CENPK	1.542	cis
CENPM	1.104	cis
CENPN	0.646	cis
CENPO	1.296	trans-inter
CENPP	0.677	cis_inter_intra
CENPQ	1.349	cis_inter_intra
CENPT	0.775	trans-inter
CENPU	0.982	cis
CENPV	0.736	cis
CENPW	0.929	cis
CEP104	0.743	cis_intra
CEP120	0.795	trans-intra
CEP128	0.839	cis_inter_intra
CEP152	0.824	cis_intra
CEP164	0.837	cis_intra
CEP170	0.192	cis_intra
CEP170B	0.277	cis_intra
CEP19	1.09	cis
CEP192	0.602	cis_intra
CEP250	0.647	trans-inter
CEP290	0.985	trans-intra
CEP350	0.184	trans-intra
CEP41	0.922	cis_intra
CEP55	1.08	cis
CEP57	0.481	cis
CEP57L1	0.94	trans-intra
CEP63	1.262	cis_intra
CEP68	0.442	cis
CEP70	0.995	trans-intra
CEP72	1.353	cis
CEP76	0.758	cis
CEP78	1.018	cis_intra
CEP85	0.53	cis_inter
CEP85L	0.707	cis_inter_intra
CEP89	1.223	cis_inter
CEP95	0.99	cis_inter_intra
CEP97	0.812	cis
CEPT1	0.244	cis_intra
CERCAM	0.819	cis
CERK	0.741	cis
CERKL	1.542	cis_inter_intra
CERS3	0.627	cis_inter_intra
CERS4	1.679	cis
CERS5	0.964	cis
CERS6	0.511	cis_intra
CES1	1.456	cis
CETP	1.499	cis
CFD	1.678	cis
CFDP1	0.754	cis_inter_intra
CFH	0.324	trans-intra
CFI	0.761	trans-intra
CFL1	0.716	cis_inter
CFL2	1.527	cis
CFLAR	0.173	cis
CFP	0.43	cis
CGGBP1	0.532	cis_inter_intra
CGN	0.948	cis
CGRRF1	0.794	cis
CHAC2	1.837	cis
CHAF1A	0.118	cis_intra
CHAF1B	0.435	cis_intra
CHAMP1	0.271	cis
CHCHD10	1.91	cis
CHCHD2	1.904	cis
CHCHD3	0.641	cis_inter_intra
CHCHD4	0.953	cis
CHCHD5	1.083	cis
CHCHD6	1.519	inter_intra
CHCHD7	1.228	cis
CHD1	0.162	cis_intra
CHD1L	1.299	cis_inter
CHD2	0.07	cis
CHD3	0.147	cis
CHD4	0.156	cis
CHD6	0.073	cis_inter_intra
CHD7	0.076	cis_inter_intra
CHD8	0.082	cis_intra
CHD9	0.17	cis_inter_intra
CHERP	0.062	cis
CHFR	0.55	cis_inter
CHGB	0.776	cis
CHI3L1	0.924	cis
CHI3L2	1.447	cis
CHIC1	0.476	trans-intra
CHIC2	0.581	trans-intra
CHID1	0.791	cis
CHIT1	1.339	cis_inter_intra
CHKA	0.479	cis_intra
CHKB	0.916	cis
CHMP1A	1.177	cis
CHMP1B	0.688	cis
CHMP2B	1.216	cis
CHMP3	0.887	cis
CHMP4A	1.582	cis
CHMP4B	0.302	cis_intra
CHMP4C	1.41	cis
CHMP5	0.807	cis
CHMP6	0.239	cis
CHMP7	0.38	cis
CHN1	0.567	cis_inter_intra
CHN2	0.628	cis_inter_intra
CHORDC1	0.375	trans-intra
CHP1	0.535	cis_inter_intra
CHPF2	1.199	cis_inter
CHPT1	0.826	cis_intra
CHRAC1	1.492	cis
CHRDL1	0.522	trans-intra
CHRM4	0.265	cis
CHRM5	0.743	cis_inter_intra
CHRNA10	1.429	cis
CHRNA2	1.259	cis
CHRNA5	1.136	cis
CHRNB1	0.996	cis
CHRNB2	0.822	cis_intra
CHRNE	0.99	cis
CHST1	0.463	cis
CHST10	0.95	cis
CHST11	0.563	cis_inter_intra
CHST12	1.283	cis
CHST13	1.732	cis_intra
CHST14	0.64	cis
CHST15	0.803	cis_inter_intra
CHST2	0.811	cis
CHST3	0.795	cis
CHST7	0.973	cis
CHST8	1.119	cis_inter_intra
CHSY1	0.405	cis_intra
CHTF18	1.161	cis
CHUK	0.285	cis
CHURC1	1.846	cis_intra
CIAO1	0.761	cis
CIAPIN1	0.836	cis_intra
CIB1	1.148	cis
CIB2	1.091	cis
CIITA	0.583	trans-intra
CILP	1.292	cis
CILP2	0.717	cis
CINP	0.78	cis_intra
CIPC	0.778	cis_inter_intra
CIR1	0.991	cis_intra
CIRBP	0.598	cis
CISD1	1.445	cis
CIT	0.261	inter_intra
CITED2	0.628	cis
CITED4	1.818	cis
CIZ1	0.4	cis
CKAP2	1.126	cis_intra
CKAP4	0.521	cis_intra
CKAP5	0.162	inter_intra
CKB	0.58	cis
CKM	0.785	cis_intra
CKMT2	1.474	trans-intra
CLASP1	0.176	cis_inter_intra
CLASP2	0.201	inter_intra
CLASRP	0.378	cis
CLC	1.746	cis
CLCA4	1.03	cis
CLCC1	0.568	trans-intra
CLCN1	0.994	cis_intra
CLCN2	0.769	cis
CLCN3	0.222	inter_intra
CLCN4	0.151	cis_intra
CLCN5	0.279	cis_intra
CLCN6	0.608	cis
CLCN7	0.394	cis_inter
CLDN1	1.177	cis
CLDN10	1.224	cis_inter_intra
CLDN11	0.385	inter_intra
CLDN12	1.094	trans-intra
CLDN15	0.977	cis
CLDN23	1.746	cis
CLDN5	0.409	cis
CLDN7	1.236	cis
CLDN9	1.899	cis
CLEC10A	1.136	cis
CLEC11A	1.116	cis
CLEC12A	1.43	cis
CLEC12B	1.1	cis
CLEC16A	0.384	cis_inter_intra
CLEC17A	0.94	cis_intra
CLEC18A	1.337	cis
CLEC18C	1.608	cis
CLEC1A	1.929	cis_inter
CLEC1B	1.446	cis
CLEC2B	1.188	cis_intra
CLEC2D	0.67	cis
CLEC2L	1.118	cis
[truncated: 9,420 more rows]
