# Supplementary material for: De novo identification of complex multimorbid conditions by integration of gene regulation and protein interaction networks with genome-wide association studies
Source: Research Square preprint supplement (doi:10.21203/rs.3.rs-1313207/v1), 2022-03-01
Supplement: Supplementary file 5 [file e7b5f3e355900347bf916889.xlsx]

## Sheet: Supplementary Data 10
Supplementary Data 10. GWAS traits enriched in each of the 4 expanded levels (+1 to +4 edges away from the asthma PPIN) and their associted summary statistics.
GWAS trait	level	trait pvalue	trait adj_pval	number of trait-associated eQTLs in expanded level	number of triat-associated eQTLs in GWAS catalog
Post bronchodilator FEV1/FVC ratio	+1	4.6767e-80	5.57463e-77	190	232
Post bronchodilator FEV1	+1	2.0402e-73	1.21596e-70	218	301
Post bronchodilator FEV1/FVC ratio in COPD	+1	1.64373e-18	6.53108e-16	62	94
Alzheimer's disease or family history of Alzheimer's disease	+1	6.74598e-10	2.0103e-07	56	112
Post bronchodilator FEV1 in COPD	+1	1.38021e-09	3.29043e-07	14	14
Pre bronchodilator FEV1	+1	2.54856e-08	5.06314e-06	12	12
Blood protein levels	+1	3.96429e-06	0.000675062	197	635
Pre bronchodilator FEV1/FVC ratio	+1	8.67692e-06	0.00129286	8	8
Family history of Alzheimer's disease	+1	0.000171014	0.0226499	18	34
Disc degeneration (lumbar)	+1	0.000323647	0.0385788	11	17
Sarcoidosis (Lofgren's syndrome vs non-Lofgren's syndrome)	+1	0.000469849	0.0450993	12	20
Systemic lupus erythematosus	+1	0.000475069	0.0450993	40	105
Lung cancer	+1	0.000491855	0.0450993	24	54
Post bronchodilator FEV1/FVC ratio in COPD	+2	2.16721e-10	3.96815e-07	78	94
Glycated hemoglobin levels	+3	1.09325e-05	0.0131846	17	28
Hip circumference	+3	5.65238e-05	0.032689	20	39
Red blood cell count	+3	9.66279e-05	0.032689	38	97
Plasma free amino acid levels	+3	0.000108421	0.032689	10	14
Plasma omega-6 polyunsaturated fatty acid levels (linoleic acid)	+3	0.000160372	0.0386818	7	8
Circulating chemerin levels	+4	8.82676e-05	0.0209539	3	4
Mean arterial pressure x alcohol consumption interaction (2df test)	+4	0.000194569	0.0209539	5	20
Mean arterial pressure	+4	0.000244955	0.0209539	8	59
Leprosy	+4	0.000249451	0.0209539	5	21
